# Supplementary material for: Adverse childhood experiences and health-related quality of life in adulthood: revelations from a community needs assessment
Source: Health Qual Life Outcomes. 2015 Aug 11;13:123. doi: 10.1186/s12955-015-0323-4 (PMC4530491; doi:10.1186/s12955-015-0323-4)
Supplement: Additional file 1: — Survey Questions and Flow. (PDF 130 kb) [file 12955_2015_323_MOESM1_ESM.pdf]

**Survey Name:** Copy of ENGLISH\_Your Health Throughout the Life Course  
**Description:** Project Survey  
**Introduction:** Welcome to the survey. Touch the Start button to continue  
**Conclusion:** Thank you for completing the survey

Survey Outline Only - Actual Survey Outlook on Tablets Screen Differs from Actual Display

## Survey Questions and Flow

| Question Type     | Question                                                                                                                                                                                                                                                       | Settings          | Statements | Answers/Ratings                                                                                                 | Next Question         |
|-------------------|----------------------------------------------------------------------------------------------------------------------------------------------------------------------------------------------------------------------------------------------------------------|-------------------|------------|-----------------------------------------------------------------------------------------------------------------|-----------------------|
| 1 : Information   | SURVEY INSTRUCTIONS: This survey should only take about 20-30 minutes of your time. Your answers will be completely anonymous and confidential. Touch on the screen to select your answer. Click the NEXT button to continue. Click the BACK button to return. |                   |            |                                                                                                                 | 2                     |
| 2 : Single Select | How long have you lived in this neighborhood? (in years)                                                                                                                                                                                                       | ◦ Answer Required |            | Less than 1 year<br>1 to 5 years<br>6 to 10 years<br>11 to 20 years<br>More than 20 years                       | 3<br>3<br>3<br>3<br>3 |
| 3 : Single Select | Please select your residential zip code:                                                                                                                                                                                                                       | ◦ Answer Required |            | 33602<br>33603<br>33605<br>33607<br>33610                                                                       | 4<br>4<br>4<br>4<br>4 |
| 4 : Single Select | Are you Male or Female?                                                                                                                                                                                                                                        | ◦ Answer Required |            | Male<br>Female                                                                                                  | 5<br>5                |
| 5 : Numeric       | How old are you? (in years completed)                                                                                                                                                                                                                          | ◦ Answer Required |            |                                                                                                                 | 6                     |
| 6 : Single Select | How do you feel now about using this tablet device to answer the survey?                                                                                                                                                                                       | ◦ Answer Required |            | I like to take the survey using this device.<br>I'd prefer my survey in paper (ask the research staff for help) | 7<br>7                |
| 7 : Image         | SECTION 1 OF 7: LIFE IN THE NEIGHBORHOOD                                                                                                                                                                                                                       |                   |            |                                                                                                                 | 8                     |
| 8 : Multi Select  | Which of the following resources are available to you in your community? MARK ALL THAT APPLY. Scroll down to find more choices.                                                                                                                                | ◦ Specify Answer  |            |                                                                                                                 | 9                     |

|  |  |  |                                                   |
|--|--|--|---------------------------------------------------|
|  |  |  | Churches                                          |
|  |  |  | Colleges, universities                            |
|  |  |  | Police/Fire Department                            |
|  |  |  | Hospitals and clinics                             |
|  |  |  | Pharmacies                                        |
|  |  |  | Mental health facilities                          |
|  |  |  | Libraries                                         |
|  |  |  | Schools                                           |
|  |  |  | Public transportation                             |
|  |  |  | Parks and recreational facilities                 |
|  |  |  | Local businesses                                  |
|  |  |  | Community centers, such as YMCA or Family Centers |
|  |  |  | Cultural activities, museums, or musical forums   |
|  |  |  | NONE of the resources listed                      |
|  |  |  | Other, please indicate                            |

|     |                                                                                            |              |                                                                                     |    |
|-----|--------------------------------------------------------------------------------------------|--------------|-------------------------------------------------------------------------------------|----|
| 9 : | Which of the following is a problem in the neighborhood? Scroll down to find more choices. | Multi Select | <ul style="list-style-type: none"> <li>Specify Answer</li> </ul>                    | 10 |
|     |                                                                                            |              | Abandoned houses, factories, or buildings                                           |    |
|     |                                                                                            |              | Vandalism, high crime rate                                                          |    |
|     |                                                                                            |              | Homeless persons/panhandling                                                        |    |
|     |                                                                                            |              | Drug/alcohol-related problems                                                       |    |
|     |                                                                                            |              | Trash or litter in empty lots, streets, or properties                               |    |
|     |                                                                                            |              | Poor quality of schools, or libraries                                               |    |
|     |                                                                                            |              | Poor quality grocery                                                                |    |
|     |                                                                                            |              | Lack of affordable shopping                                                         |    |
|     |                                                                                            |              | Poor police response                                                                |    |
|     |                                                                                            |              | Lack of quality of recreation, parks, or sports facilities                          |    |
|     |                                                                                            |              | Junkyards, gasoline stations, and other non-residential                             |    |
|     |                                                                                            |              | Dogs and uncontrolled animals                                                       |    |
|     |                                                                                            |              | Industrial hazards such as incinerators, chemical plants, and hazardous waste sites |    |
|     |                                                                                            |              | NONE of the problems listed                                                         |    |
|     |                                                                                            |              | Other, please indicate                                                              |    |

|      |                                    |       |  |    |
|------|------------------------------------|-------|--|----|
| 10 : | SECTION 2 OF 7: SOCIAL CONNECTIONS | Image |  | 11 |
|------|------------------------------------|-------|--|----|

|      |                                                                                                                                                                         |         |                                                                   |    |
|------|-------------------------------------------------------------------------------------------------------------------------------------------------------------------------|---------|-------------------------------------------------------------------|----|
| 11 : | About how many close friends and close relatives do you have (people you feel at ease with and can talk to about what is on your mind)? (SUM ALL FRIENDS AND RELATIVES) | Numeric | <ul style="list-style-type: none"> <li>Answer Required</li> </ul> | 12 |
|------|-------------------------------------------------------------------------------------------------------------------------------------------------------------------------|---------|-------------------------------------------------------------------|----|

- People around here are willing to help their neighbors
- This is a close-knit

|    |   |                      |                                                                                                                     |                   |                                                                                                                                                                                                                                                                                                              |                                  |
|----|---|----------------------|---------------------------------------------------------------------------------------------------------------------|-------------------|--------------------------------------------------------------------------------------------------------------------------------------------------------------------------------------------------------------------------------------------------------------------------------------------------------------|----------------------------------|
| 12 | : | Grid Scale           | In thinking about the people in the neighborhood in which you live now, how strongly do you agree or disagree that: | ◦ Answer Required | neighborhood<br>◦ People in this neighborhood generally get along with each other<br>◦ People in this neighborhood share the same values                                                                                                                                                                     | 13                               |
|    |   |                      |                                                                                                                     |                   | Strongly Disagree<br>Disagree<br>Neither Agree nor Disagree<br>Agree<br>Strongly Agree                                                                                                                                                                                                                       |                                  |
| 13 | : | Grid - Single Select | How often is each of the following kinds of support available to you if you need it?                                | ◦ Answer Required | ◦ Someone to confide in or talk about yourself or your problems<br>◦ Someone to share your most private worries and fears with<br>◦ Someone to help you if you were confined to bed<br>◦ Someone to prepare your meals if you were unable to do it yourself<br>◦ Someone to get together with for relaxation | 14                               |
|    |   |                      |                                                                                                                     |                   | None of the time<br>A little of the time<br>Some of the time<br>Most of the time<br>All of the time                                                                                                                                                                                                          |                                  |
| 14 | : | Image                | SECTION 3 OF 7: HEALTH AND QUALITY OF LIFE                                                                          |                   |                                                                                                                                                                                                                                                                                                              | 15                               |
| 15 | : | Single Select        | Would you say that in general your health is:                                                                       | ◦ Answer Required |                                                                                                                                                                                                                                                                                                              | 16                               |
|    |   |                      |                                                                                                                     |                   | Excellent<br>Very Good<br>Good<br>Fair<br>Poor<br>Don't know/not sure                                                                                                                                                                                                                                        | 16<br>16<br>16<br>16<br>16<br>16 |
|    |   |                      |                                                                                                                     | ◦ Answer          |                                                                                                                                                                                                                                                                                                              |                                  |

|         |               |                                                                                                                                                                                                       |                                                                                                                                                                                                                                                                                                                                                                                                                                                                                                                                                                                                                                                                        |    |
|---------|---------------|-------------------------------------------------------------------------------------------------------------------------------------------------------------------------------------------------------|------------------------------------------------------------------------------------------------------------------------------------------------------------------------------------------------------------------------------------------------------------------------------------------------------------------------------------------------------------------------------------------------------------------------------------------------------------------------------------------------------------------------------------------------------------------------------------------------------------------------------------------------------------------------|----|
| 16<br>: | Numeric       | Now thinking about your physical health, which includes physical illness and injury, for how many days during the past 30 days was your physical health not good? ( If none, put 0 for zero days)     | <ul style="list-style-type: none"> <li>Required</li> <li>Prefix-Days</li> </ul>                                                                                                                                                                                                                                                                                                                                                                                                                                                                                                                                                                                        | 17 |
| 17<br>: | Numeric       | Now thinking about your mental health, which includes stress, depression, and problems with emotions, for how many days during the past 30 days was your mental health not good? (If none, put 0)     | <ul style="list-style-type: none"> <li>Answer Required</li> <li>Prefix-Days</li> </ul>                                                                                                                                                                                                                                                                                                                                                                                                                                                                                                                                                                                 | 18 |
| 18<br>: | Numeric       | During the past 30 days, for about how many days did poor physical or mental health keep you from doing your usual activities, such as taking care of yourself, work, or recreation? (if none, put 0) | <ul style="list-style-type: none"> <li>Answer Required</li> <li>Prefix-Days</li> </ul>                                                                                                                                                                                                                                                                                                                                                                                                                                                                                                                                                                                 | 19 |
| 19<br>: | Multi Select  | In the LAST 12 MONTHS, have you suffered any of the following health problems? Scroll down for more choices.                                                                                          | <ul style="list-style-type: none"> <li>Answer Required</li> <li>Specify Answer</li> <li>Min Answers-1</li> </ul>                                                                                                                                                                                                                                                                                                                                                                                                                                                                                                                                                       | 20 |
|         |               |                                                                                                                                                                                                       | <ul style="list-style-type: none"> <li>Arthritis/rheumatism</li> <li>Back or neck problem</li> <li>Walking problem</li> <li>Fractures, or bone/joint injury</li> <li>Infections</li> <li>Lung/breathing problem</li> <li>Hearing problem</li> <li>Eye/vision problem</li> <li>Heart problem</li> <li>Stroke problem</li> <li>Hypertension/high blood pressure</li> <li>Diabetes or high blood sugar</li> <li>Stress</li> <li>Cancer</li> <li>Emotional problems/Depression/Anxiety</li> <li>Drinking problem/Alcoholism</li> <li>Substance abuse</li> <li>Overweight or obesity</li> <li>NONE of these problems</li> <li>Other impairment or health problem</li> </ul> |    |
| 20<br>: | Numeric       | During the past 30 days, for about how many days have you felt you did NOT get ENOUGH REST or SLEEP?                                                                                                  | <ul style="list-style-type: none"> <li>Answer Required</li> <li>Prefix-Days</li> </ul>                                                                                                                                                                                                                                                                                                                                                                                                                                                                                                                                                                                 | 21 |
| 21<br>: | Single Select | In a scale from 1 to 10, where do you think you stand at this time in your life, relative to other people in your community?                                                                          | <ul style="list-style-type: none"> <li>Answer Required</li> </ul>                                                                                                                                                                                                                                                                                                                                                                                                                                                                                                                                                                                                      | 22 |
|         |               |                                                                                                                                                                                                       | 1 - WORST OFF                                                                                                                                                                                                                                                                                                                                                                                                                                                                                                                                                                                                                                                          | 22 |
|         |               |                                                                                                                                                                                                       | 2                                                                                                                                                                                                                                                                                                                                                                                                                                                                                                                                                                                                                                                                      | 22 |
|         |               |                                                                                                                                                                                                       | 3                                                                                                                                                                                                                                                                                                                                                                                                                                                                                                                                                                                                                                                                      | 22 |
|         |               |                                                                                                                                                                                                       | 4                                                                                                                                                                                                                                                                                                                                                                                                                                                                                                                                                                                                                                                                      | 22 |

|  |  |               |    |
|--|--|---------------|----|
|  |  | 5             | 22 |
|  |  | 6             | 22 |
|  |  | 7             | 22 |
|  |  | 8             | 22 |
|  |  | 9             | 22 |
|  |  | 10 - BEST OFF | 22 |

|    |                                             |  |    |
|----|---------------------------------------------|--|----|
| 22 | SECTION 4 OF 7: STRESS AND UNFAIR TREATMENT |  | 23 |
| :  | Image                                       |  |    |

|    |                      |                                                                                                                                                                                                                                                                                                                                                       |    |
|----|----------------------|-------------------------------------------------------------------------------------------------------------------------------------------------------------------------------------------------------------------------------------------------------------------------------------------------------------------------------------------------------|----|
|    |                      | <ul style="list-style-type: none"> <li>...felt that you were unable to control the important things in your life?</li> <li>...felt confident about your ability to handle your personal problems?</li> <li>...felt that things were going your way?</li> <li>...felt difficulties were piling up so high that you could not overcome them?</li> </ul> |    |
| 23 | Grid - Single Select | In the LAST MONTH, how often have you...                                                                                                                                                                                                                                                                                                              | 24 |
| :  |                      |                                                                                                                                                                                                                                                                                                                                                       |    |
|    |                      | <ul style="list-style-type: none"> <li>Answer Required</li> </ul>                                                                                                                                                                                                                                                                                     |    |
|    |                      | <ul style="list-style-type: none"> <li>Never</li> <li>Almost Never</li> <li>Sometimes</li> <li>Fairly Often</li> <li>Very Often</li> </ul>                                                                                                                                                                                                            |    |

|    |                                                                                           |                                                                                                                                                                                                                            |    |
|----|-------------------------------------------------------------------------------------------|----------------------------------------------------------------------------------------------------------------------------------------------------------------------------------------------------------------------------|----|
|    |                                                                                           | <ul style="list-style-type: none"> <li>Answer Required</li> <li>Min Answers- 1</li> </ul>                                                                                                                                  |    |
| 24 | In the LAST 12 MONTHS, what things have you felt most stress about? (MARK ALL THAT APPLY) |                                                                                                                                                                                                                            | 25 |
| :  | Multi Select                                                                              |                                                                                                                                                                                                                            |    |
|    |                                                                                           | <ul style="list-style-type: none"> <li>Family</li> <li>Money</li> <li>Housing</li> <li>Children</li> <li>Work</li> <li>Food</li> <li>Partner</li> <li>Other</li> <li>Not applicable/No stress in last 12 months</li> </ul> |    |

- I talk to trusted friends or counsel family members

|    |                      |                                                                                                          |                                                                                                                                                                                                                                                                                                                                                                                                                       |    |
|----|----------------------|----------------------------------------------------------------------------------------------------------|-----------------------------------------------------------------------------------------------------------------------------------------------------------------------------------------------------------------------------------------------------------------------------------------------------------------------------------------------------------------------------------------------------------------------|----|
| 25 | Grid - Single Select | When thinking about solving my difficulties or problems...                                               | <ul style="list-style-type: none"> <li>◦ Answer Required</li> <li>◦ The spiritual support/faith in God received is my comfort and strength to guide me</li> <li>◦ I wait for the spirit/God to take control and work it out</li> <li>◦ I try to come up with possible solutions on my own</li> </ul>                                                                                                                  | 26 |
|    |                      |                                                                                                          | Never<br>Almost Never<br>Sometimes<br>Fairly Often<br>Very Often                                                                                                                                                                                                                                                                                                                                                      |    |
| 26 | Multi Select         | When you have problems, where do you go for support or assistance: (MARK ALL THAT APPLY)                 | <ul style="list-style-type: none"> <li>◦ Answer Required</li> <li>◦ Specify Answer</li> <li>◦ Min Answers- 1</li> </ul>                                                                                                                                                                                                                                                                                               | 27 |
|    |                      |                                                                                                          | Friends/Neighbors<br>Public programs<br>Non-profit programs<br>Church or faith-based service<br>Family<br>None of the above<br>Other                                                                                                                                                                                                                                                                                  |    |
| 27 | Grid - Single Select | Have you experienced discrimination, hassled, or made inferior because of your personal characteristics? | <ul style="list-style-type: none"> <li>◦ Answer Required</li> <li>◦ At school</li> <li>◦ Getting hired or getting a job</li> <li>◦ At work</li> <li>◦ Getting housing</li> <li>◦ Getting medical care</li> <li>◦ Getting service in a store or restaurant</li> <li>◦ Getting credit, bank loans, or a mortgage</li> <li>◦ On the street or in a public setting</li> <li>◦ From the police or in the courts</li> </ul> | 28 |
|    |                      |                                                                                                          | NO, NEVER<br>At least once                                                                                                                                                                                                                                                                                                                                                                                            |    |

|       |   |               |                                                                                |                                                                                                                    |                                                                         |    |
|-------|---|---------------|--------------------------------------------------------------------------------|--------------------------------------------------------------------------------------------------------------------|-------------------------------------------------------------------------|----|
| 28    | : | Multi Select  | What do you think was/were the reason(s) for that experience? (ALL THAT APPLY) | <ul style="list-style-type: none"><li>◦ Answer Required</li><li>◦ Specify Answer</li><li>◦ Min Answers-1</li></ul> | 29                                                                      |    |
|       |   |               |                                                                                |                                                                                                                    | Your ancestry or national origins                                       |    |
|       |   |               |                                                                                |                                                                                                                    | Your gender                                                             |    |
|       |   |               |                                                                                |                                                                                                                    | Your race                                                               |    |
|       |   |               |                                                                                |                                                                                                                    | Your ethnicity                                                          |    |
|       |   |               |                                                                                |                                                                                                                    | Your age                                                                |    |
|       |   |               |                                                                                |                                                                                                                    | Your religion                                                           |    |
|       |   |               |                                                                                |                                                                                                                    | Your height or weight                                                   |    |
|       |   |               |                                                                                |                                                                                                                    | Your shade of skin color                                                |    |
|       |   |               |                                                                                |                                                                                                                    | Your sexual orientation                                                 |    |
|       |   |               |                                                                                |                                                                                                                    | Your education or income level                                          |    |
|       |   |               |                                                                                |                                                                                                                    | A physical disability                                                   |    |
|       |   |               |                                                                                |                                                                                                                    | Your personal beliefs                                                   |    |
|       |   |               |                                                                                |                                                                                                                    | Other                                                                   |    |
| <hr/> |   |               |                                                                                |                                                                                                                    |                                                                         |    |
| 29    | : | Information   | SECTION 5 OF 7: LIFE STYLE QUESTIONS                                           |                                                                                                                    | 30                                                                      |    |
| <hr/> |   |               |                                                                                |                                                                                                                    |                                                                         |    |
| 30    | : | Single Select | Have you smoked at least 100 cigarettes in your entire life?                   | <ul style="list-style-type: none"><li>◦ Answer Required</li></ul>                                                  | 31                                                                      |    |
|       |   |               |                                                                                |                                                                                                                    | Yes                                                                     | 31 |
|       |   |               |                                                                                |                                                                                                                    | No                                                                      | 31 |
|       |   |               |                                                                                |                                                                                                                    | Don't know / Refuse to answer                                           | 31 |
| <hr/> |   |               |                                                                                |                                                                                                                    |                                                                         |    |
| 31    | : | Single Select | During your first 18 years of life did anyone in your household smoke?         | <ul style="list-style-type: none"><li>◦ Answer Required</li></ul>                                                  | 32                                                                      |    |
|       |   |               |                                                                                |                                                                                                                    | Yes                                                                     | 32 |
|       |   |               |                                                                                |                                                                                                                    | No                                                                      | 32 |
|       |   |               |                                                                                |                                                                                                                    | Don't know                                                              | 32 |
| <hr/> |   |               |                                                                                |                                                                                                                    |                                                                         |    |
| 32    | : | Single Select | How often do you drink alcoholic beverages?                                    | <ul style="list-style-type: none"><li>◦ Answer Required</li></ul>                                                  | 33                                                                      |    |
|       |   |               |                                                                                |                                                                                                                    | I do not drink at this time/I stopped drinking for more than a year now | 33 |
|       |   |               |                                                                                |                                                                                                                    | Less than Once a Month                                                  | 33 |
|       |   |               |                                                                                |                                                                                                                    | Once a Month                                                            | 33 |
|       |   |               |                                                                                |                                                                                                                    | 2-3 Times a Month                                                       | 33 |
|       |   |               |                                                                                |                                                                                                                    | Once a Week                                                             | 33 |
|       |   |               |                                                                                |                                                                                                                    | 2-3 Times a Week                                                        | 33 |
|       |   |               |                                                                                |                                                                                                                    | 4-6 Times a Week                                                        | 33 |
|       |   |               |                                                                                |                                                                                                                    | Everyday                                                                | 33 |

|         |                  |                                                                                  |                      |                                                                   |    |
|---------|------------------|----------------------------------------------------------------------------------|----------------------|-------------------------------------------------------------------|----|
| 33<br>: | Single<br>Select | Do you use sometimes use drugs for recreation, or not prescribed by your doctor? | ◦ Answer<br>Required |                                                                   | 34 |
|         |                  |                                                                                  |                      | I do not use drugs/I stopped using drugs for more than 1 year now | 34 |
|         |                  |                                                                                  |                      | Less than Once a Month                                            | 34 |
|         |                  |                                                                                  |                      | Once a Month                                                      | 34 |
|         |                  |                                                                                  |                      | 2-3 Times a Month                                                 | 34 |
|         |                  |                                                                                  |                      | Once a Week                                                       | 34 |
|         |                  |                                                                                  |                      | 2-3 Times a Week                                                  | 34 |
|         |                  |                                                                                  |                      | 4-6 Times a Week                                                  | 34 |
|         |                  |                                                                                  |                      | Everyday                                                          | 34 |
|         |                  |                                                                                  |                      | Refuse to answer/Not sure                                         | 34 |

|         |                            |                                                                       |                      |                                                             |    |
|---------|----------------------------|-----------------------------------------------------------------------|----------------------|-------------------------------------------------------------|----|
| 34<br>: | Grid -<br>Single<br>Select | In a typical month, how often do you eat the following types of food? | ◦ Answer<br>Required | ◦ Bread, cereal, rice, and pasta                            | 35 |
|         |                            |                                                                       |                      | ◦ Fruits and vegetables                                     |    |
|         |                            |                                                                       |                      | ◦ Dairy products (milk, yogurt, and cheese)                 |    |
|         |                            |                                                                       |                      | ◦ Meat, poultry, or pork                                    |    |
|         |                            |                                                                       |                      | ◦ Seafood (fish, shrimp, tuna, etc)                         |    |
|         |                            |                                                                       |                      | ◦ Fried food (High-fat foods)                               |    |
|         |                            |                                                                       |                      | ◦ Salty foods or snacks (like salted crackers or pretzels.) |    |
|         |                            |                                                                       |                      | ◦ Sugary foods (sweets or pastries)                         |    |
|         |                            |                                                                       |                      | ◦ Coffee, sodas, or energy drinks                           |    |
|         |                            |                                                                       |                      | Once a Month or less                                        |    |
|         |                            |                                                                       |                      | 2-3 Times a Month                                           |    |
|         |                            |                                                                       |                      | Once a Week                                                 |    |
|         |                            |                                                                       |                      | 2-3 Times a Week                                            |    |
|         |                            |                                                                       |                      | 4-6 Times a Week or more                                    |    |

|         |                  |                                                                                                                                           |                      |                          |    |
|---------|------------------|-------------------------------------------------------------------------------------------------------------------------------------------|----------------------|--------------------------|----|
| 35<br>: | Single<br>Select | During the past month, about how many days per week did you exercise for recreation or to keep in shape (activities that make you sweat)? | ◦ Answer<br>Required |                          | 36 |
|         |                  |                                                                                                                                           |                      | Once a Month or less     | 36 |
|         |                  |                                                                                                                                           |                      | 2-3 Times a Month        | 36 |
|         |                  |                                                                                                                                           |                      | Once a Week              | 36 |
|         |                  |                                                                                                                                           |                      | 2-3 Times a Week         | 36 |
|         |                  |                                                                                                                                           |                      | 4-6 Times a Week or more | 36 |

|         |             |                                                                               |  |    |
|---------|-------------|-------------------------------------------------------------------------------|--|----|
| 36<br>: | Information | The next questions are about any personal concerns you may have about AIDS... |  | 37 |
|---------|-------------|-------------------------------------------------------------------------------|--|----|

|    |                      |                                                                                                                                             |                                                                                                                                                                                                                                                                                                                                                                                     |    |
|----|----------------------|---------------------------------------------------------------------------------------------------------------------------------------------|-------------------------------------------------------------------------------------------------------------------------------------------------------------------------------------------------------------------------------------------------------------------------------------------------------------------------------------------------------------------------------------|----|
| 37 | Single Select        | Are you currently sexually active with a partner?                                                                                           | <ul style="list-style-type: none"> <li>Answer Required</li> </ul>                                                                                                                                                                                                                                                                                                                   | 38 |
|    |                      |                                                                                                                                             | Yes                                                                                                                                                                                                                                                                                                                                                                                 | 38 |
|    |                      |                                                                                                                                             | No                                                                                                                                                                                                                                                                                                                                                                                  | 38 |
|    |                      |                                                                                                                                             | Refuse to answer/Don't know                                                                                                                                                                                                                                                                                                                                                         | 38 |
| 38 | Single Select        | In the next 5 years, is it likely or unlikely that the average [man/woman] in your age group in your community will get the AIDS/HIV virus? | <ul style="list-style-type: none"> <li>Answer Required</li> </ul>                                                                                                                                                                                                                                                                                                                   | 39 |
|    |                      |                                                                                                                                             | Very likely                                                                                                                                                                                                                                                                                                                                                                         | 39 |
|    |                      |                                                                                                                                             | Somewhat likely                                                                                                                                                                                                                                                                                                                                                                     | 39 |
|    |                      |                                                                                                                                             | Somewhat unlikely                                                                                                                                                                                                                                                                                                                                                                   | 39 |
|    |                      |                                                                                                                                             | Very unlikely                                                                                                                                                                                                                                                                                                                                                                       | 39 |
|    |                      |                                                                                                                                             | Don't know/Refuse to Answer                                                                                                                                                                                                                                                                                                                                                         | 39 |
| 39 | Image                | SECTION 6 OF 7: FAMILY HISTORY AND CHILDHOOD                                                                                                |                                                                                                                                                                                                                                                                                                                                                                                     | 40 |
| 40 | Grid - Single Select | When you were growing up, how often did the following situations happen in your family?                                                     | <ul style="list-style-type: none"> <li> <ul style="list-style-type: none"> <li>We talked about our problems.</li> <li>When we argued, we listened to "both sides of the story."</li> <li>We took time to listen to each other.</li> <li>We pulled together when things were stressful.</li> <li>We were able to solve our problems.</li> </ul> </li> <li>Answer Required</li> </ul> | 41 |
|    |                      |                                                                                                                                             | Never                                                                                                                                                                                                                                                                                                                                                                               |    |
|    |                      |                                                                                                                                             | Rarely                                                                                                                                                                                                                                                                                                                                                                              |    |
|    |                      |                                                                                                                                             | Sometimes                                                                                                                                                                                                                                                                                                                                                                           |    |
|    |                      |                                                                                                                                             | Often                                                                                                                                                                                                                                                                                                                                                                               |    |
|    |                      |                                                                                                                                             | All of the time                                                                                                                                                                                                                                                                                                                                                                     |    |
| 41 | Grid - Single Select | During your first 18 years of life, how often the following types of supports were available to you?                                        | <ul style="list-style-type: none"> <li> <ul style="list-style-type: none"> <li>I had others who would listen when I needed to talk about my problems.</li> <li>When I was lonely, there were several people I can talk to.</li> <li>I had someone to turn to if I needed food or housing.</li> <li>If there was a</li> </ul> </li> <li>Answer Required</li> </ul>                   | 42 |

crisis, I had  
others I can  
talk to.

- If I needed  
help in school,  
I would know  
where to go  
for help.

Never  
Rarely  
Sometimes  
Often  
All of the time

---

**42**  
: Information      The following questions ask about difficult experiences when you were growing up. All information is anonymous and confidential. Your responses will help us understand how much need exists in the community for addressing sad or traumatic experiences among children. 43

---

**43**  
: Single Select      Did a parent or other adult in the household often or very often swear at you, insult you, put you down, or humiliate you? OR Act in a way that made you afraid that you might be physically hurt?      ◦ Answer Required 44

Yes 44  
No 44  
Refuse to answer/Don't know 44

---

**44**  
: Single Select      Did a parent or other adult in the household often or very often...push, grab, slap, or throw something at you? OR Ever hit you so hard that you had marks or were injured?      ◦ Answer Required 45

Yes 45  
No 45  
Refuse to answer/Don't know 45

---

**45**  
: Single Select      Did an adult or person at least 5 years older than you ever..touch your in a sexual manner or fondle you or have you touch their body in a sexual way? OR Attempt or actually have intercourse with you?      ◦ Answer Required 46

Yes 46  
No 46  
Refuse to answer/Don't know 46

---

**46**  
: Single Select      Did you often or very often feel that...No one in your family loved you or thought you were important or special? OR Your family didn't look out for each other, feel close to each other, or support each other?      ◦ Answer Required 47

Yes 47  
No 47  
Refuse to answer/Don't know 47

---

**47**  
: Single Select      Did you often or very often feel that...You didn't have enough to eat, had to wear dirty clothes, and had no one to protect you?      ◦ Answer Required 48

Yes 48  
No 48  
Refuse to answer/Don't know 48

---

**48**  
: Single Select      Were your parents ever separated or divorced?      ◦ Answer Required 49

Yes 49  
No 49

|    |               |                                                                                                                                                                                                                                                         |                                                                       |    |
|----|---------------|---------------------------------------------------------------------------------------------------------------------------------------------------------------------------------------------------------------------------------------------------------|-----------------------------------------------------------------------|----|
|    |               |                                                                                                                                                                                                                                                         | My parents were never married                                         | 49 |
|    |               |                                                                                                                                                                                                                                                         | Refuse to answer/Don't know                                           | 49 |
| 49 | Single Select | Was your female caretaker: Often or very often pushed, grabbed, slapped, or had something thrown at her? OR Sometimes, often, or very often kicked, bitten, hit with a fist, or hit with something hard? OR Ever repeatedly hit at least a few minutes? | ◦ Answer Required                                                     | 50 |
|    |               |                                                                                                                                                                                                                                                         | Yes                                                                   | 50 |
|    |               |                                                                                                                                                                                                                                                         | No                                                                    | 50 |
|    |               |                                                                                                                                                                                                                                                         | Refuse to answer/Don't know                                           | 50 |
| 50 | Single Select | Did you live with anyone who was a problem drinker or alcoholic or who used street drugs?                                                                                                                                                               | ◦ Answer Required                                                     | 51 |
|    |               |                                                                                                                                                                                                                                                         | Yes                                                                   | 51 |
|    |               |                                                                                                                                                                                                                                                         | No                                                                    | 51 |
|    |               |                                                                                                                                                                                                                                                         | Refuse to answer/Don't know                                           | 51 |
| 51 | Single Select | Was a household member depressed or mentally ill, or did a household member attempt suicide?                                                                                                                                                            | ◦ Answer Required                                                     | 52 |
|    |               |                                                                                                                                                                                                                                                         | Yes                                                                   | 52 |
|    |               |                                                                                                                                                                                                                                                         | No                                                                    | 52 |
|    |               |                                                                                                                                                                                                                                                         | Refuse to answer/Don't know                                           | 52 |
| 52 | Single Select | Did a household member go to prison?                                                                                                                                                                                                                    |                                                                       | 53 |
|    |               |                                                                                                                                                                                                                                                         | Yes                                                                   | 53 |
|    |               |                                                                                                                                                                                                                                                         | No                                                                    | 53 |
|    |               |                                                                                                                                                                                                                                                         | Refuse to answer/Don't know                                           | 53 |
| 53 | Image         | SECTION 7 OF 7: SOCIODEMOGRAPHICS                                                                                                                                                                                                                       |                                                                       | 54 |
| 54 | Single Select | What is the highest level of education you have completed?                                                                                                                                                                                              | ◦ Answer Required                                                     | 55 |
|    |               |                                                                                                                                                                                                                                                         | No schooling completed                                                | 55 |
|    |               |                                                                                                                                                                                                                                                         | Nursery school to 8th grade                                           | 55 |
|    |               |                                                                                                                                                                                                                                                         | Some high school, but not currently studying                          | 55 |
|    |               |                                                                                                                                                                                                                                                         | Currently in high school or working toward high school or GED diploma | 55 |
|    |               |                                                                                                                                                                                                                                                         | High school graduate, diploma or the equivalent (GED)                 | 55 |
|    |               |                                                                                                                                                                                                                                                         | Trade/technical/vocational training                                   | 55 |
|    |               |                                                                                                                                                                                                                                                         | Some college credit, no degree                                        | 55 |
|    |               |                                                                                                                                                                                                                                                         | Associate degree                                                      | 55 |
|    |               |                                                                                                                                                                                                                                                         | Bachelor's Degree                                                     | 55 |
|    |               |                                                                                                                                                                                                                                                         | Master's Degree or Professional or Doctoral Degree                    | 55 |
| 55 | Single        | Please indicate your current marital status?                                                                                                                                                                                                            | ◦ Answer                                                              | 56 |

| Select |                                                                                    | Required          |                                                |    |
|--------|------------------------------------------------------------------------------------|-------------------|------------------------------------------------|----|
|        |                                                                                    |                   | Single, never married                          | 56 |
|        |                                                                                    |                   | Married or domestic partnership                | 56 |
|        |                                                                                    |                   | Widowed                                        | 56 |
|        |                                                                                    |                   | Divorced                                       | 56 |
|        |                                                                                    |                   | Separated                                      | 56 |
|        |                                                                                    |                   | Other                                          | 56 |
|        |                                                                                    |                   | Refuse to Answer                               | 56 |
| <hr/>  |                                                                                    |                   |                                                |    |
| 56     | Are you of Latino, Hispanic, or Spanish descent?                                   | ◦ Answer Required |                                                | 57 |
| :      | Single Select                                                                      |                   | No                                             | 57 |
|        |                                                                                    |                   | Yes                                            | 57 |
|        |                                                                                    |                   | Refuse to answer/Don't know                    | 57 |
| <hr/>  |                                                                                    |                   |                                                |    |
| 57     | Which racial group do you identify yourself with more? (One or more if applicable) | ◦ Answer Required |                                                | 58 |
| :      | Multi Select                                                                       | ◦ Min Answers-1   | Asian                                          |    |
|        |                                                                                    |                   | Black or African American                      |    |
|        |                                                                                    |                   | White or Caucasian                             |    |
|        |                                                                                    |                   | American Indian or Alaska Native               |    |
|        |                                                                                    |                   | Pacific Islander or Native Hawaiian            |    |
|        |                                                                                    |                   | Other race                                     |    |
|        |                                                                                    |                   | Don't know/Refuse to answer                    |    |
| <hr/>  |                                                                                    |                   |                                                |    |
| 58     | Which of the following best describes your employment status?                      | ◦ Answer Required |                                                | 59 |
| :      | Single Select                                                                      |                   | Employed for wages                             | 59 |
|        |                                                                                    |                   | Self-employed                                  | 59 |
|        |                                                                                    |                   | Out of work and looking for work               | 59 |
|        |                                                                                    |                   | Out of work and not currently looking for work | 59 |
|        |                                                                                    |                   | A homemaker                                    | 59 |
|        |                                                                                    |                   | A student                                      | 59 |
|        |                                                                                    |                   | Military                                       | 59 |
|        |                                                                                    |                   | Retired                                        | 59 |
|        |                                                                                    |                   | Unable to work                                 | 59 |
|        |                                                                                    |                   | Refuse to answer/Don't know                    | 59 |
| <hr/>  |                                                                                    |                   |                                                |    |
| 59     | Do you receive any of the following assistance? (MARK ALL THAT APPLY)              | ◦ Answer Required |                                                | 60 |
| :      | Multi Select                                                                       | ◦ Min Answers-1   | Section 8 (Housing Choice Voucher Program)     |    |
|        |                                                                                    |                   | Food Stamps (SNAP)                             |    |
|        |                                                                                    |                   | School free or reduced lunches                 |    |

Medicaid  
SSI (Supplemental Security Income)  
TANF (Temporary Assistance for Needy Families, also known as "welfare")  
Other assistance  
Refuse to answer/Don't know

|    |                                                                                                                                                  |                               |    |
|----|--------------------------------------------------------------------------------------------------------------------------------------------------|-------------------------------|----|
| 60 | To the best of your knowledge, what is your household annual income (in US dollars)?<br>REMEMBER: Your information is confidential and anonymous | ◦ Answer Required             | 61 |
| :  | Single Select                                                                                                                                    |                               |    |
|    |                                                                                                                                                  | \$0-10,000                    | 61 |
|    |                                                                                                                                                  | \$10,001 - 20,000             | 61 |
|    |                                                                                                                                                  | \$20,001 - 30,000             | 61 |
|    |                                                                                                                                                  | \$30,001 - 40,000             | 61 |
|    |                                                                                                                                                  | \$40,001 - 50,000             | 61 |
|    |                                                                                                                                                  | More than \$50,000            | 61 |
|    |                                                                                                                                                  | Don't know / Refuse to answer | 61 |

|    |                                                                                                       |                                      |    |
|----|-------------------------------------------------------------------------------------------------------|--------------------------------------|----|
| 61 | How many people are currently living in your household, including yourself, that live on that income? | ◦ Prefix- Number<br>◦ Suffix- people | 62 |
| :  | Numeric                                                                                               |                                      |    |

|    |                                                                                                                                 |                                                                                       |    |
|----|---------------------------------------------------------------------------------------------------------------------------------|---------------------------------------------------------------------------------------|----|
| 62 | Thanks for making it to this point, before you go, please tell us how you felt about taking questions with this portable device | ◦ Answer Required                                                                     | 63 |
| :  | Grid - Single Select                                                                                                            |                                                                                       |    |
|    |                                                                                                                                 | ◦ I think that I would like to use this survey device frequently                      |    |
|    |                                                                                                                                 | ◦ I found the survey device unnecessarily complex                                     |    |
|    |                                                                                                                                 | ◦ I thought the survey device was easy to use                                         |    |
|    |                                                                                                                                 | ◦ I thought there was too much inconsistency in the survey                            |    |
|    |                                                                                                                                 | ◦ I would imagine that most people would learn to use this survey system very quickly |    |
|    |                                                                                                                                 | ◦ I found the survey device was cumbersome to use                                     |    |
|    |                                                                                                                                 | ◦ I felt very confident using this system                                             |    |
|    |                                                                                                                                 | ◦ I needed to learn a lot of things before I could get going with the                 |    |

Strongly Disagree  
Disagree  
Neutral  
Agree  
Strongly Agree

---

|    |               |                                                                                                                     |                                                              |    |
|----|---------------|---------------------------------------------------------------------------------------------------------------------|--------------------------------------------------------------|----|
| 63 | Single Select | Before you took this survey, what was your previous experience with tablet computers or portable devices like this? | Answer Required                                              | 64 |
|    |               |                                                                                                                     |                                                              |    |
|    |               |                                                                                                                     | This is the first time I use a device like this              | 64 |
|    |               |                                                                                                                     | I have used a few times tablet PCs, smartphones, or i-phones | 64 |
|    |               |                                                                                                                     | I use devices like this regularly                            | 64 |

---

|    |             |                                                                                                                                                                                                                              |  |            |
|----|-------------|------------------------------------------------------------------------------------------------------------------------------------------------------------------------------------------------------------------------------|--|------------|
| 64 | Information | THANK YOU FOR YOUR RESPONSES Click NEXT TO SUBMIT your responses. If you have questions about this survey, please tell the research staff, or call REACHUP Inc at: (813) 712-6300 You can also email at: cbprtampa@gmail.com |  | Conclusion |
|----|-------------|------------------------------------------------------------------------------------------------------------------------------------------------------------------------------------------------------------------------------|--|------------|

---
